# Supplementary material
Source: HighWire-hosted journal article supplement (https://msb.embopress.org/content/10/6/731)
Supplement: inline-supplementary-material-5 [file inline-supplementary-material-5.pdf]

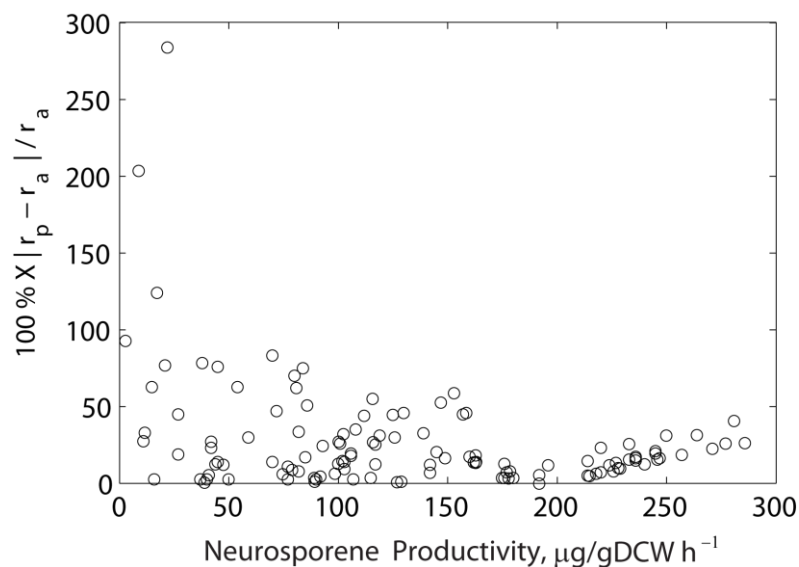

**Supplementary Figure S5:** The kinetic model's error distribution for neurosporene content predictions. The model's predictions have higher accuracy at higher neurosporene production rate.  $r_p$  is the predicted pathway productivity.  $r_a$  is the actual, measured pathway productivity. The average error of prediction for all characterized pathways is 32%. There are two outliers responsible for the most error.
