# Supplementary material
Source: HighWire-hosted journal article supplement (https://msb.embopress.org/content/10/6/731)
Supplement: inline-supplementary-material-10 [file inline-supplementary-material-10.pdf]

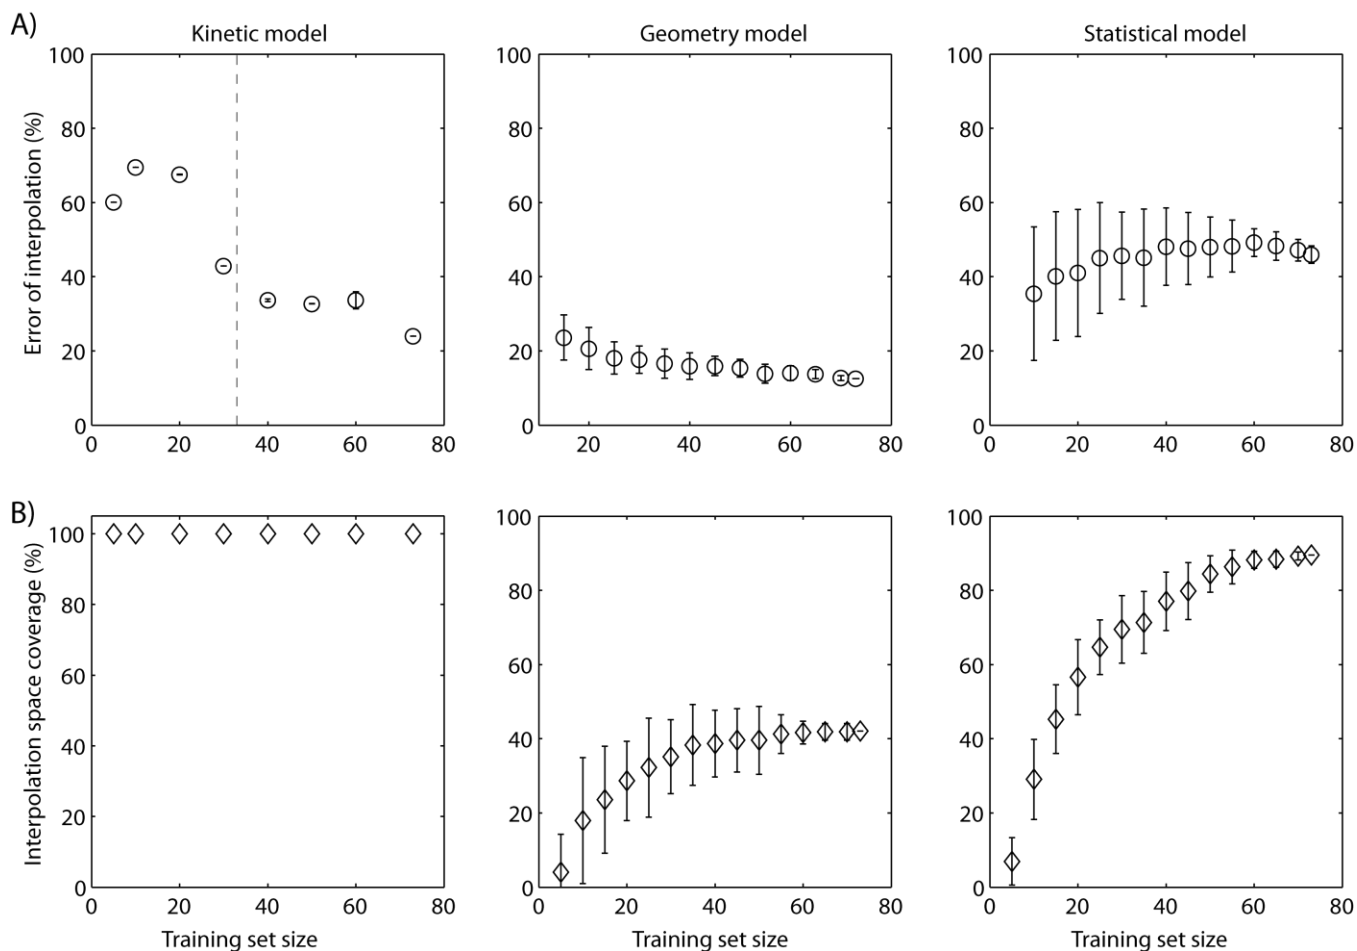

**Supplementary Figure S10:** Effect of training set size on model predictions. (A) Error of interpolation (B) percentage of the test set pathway variants that could be evaluated by the models. To have a reliable prediction from kinetic model, the training set size should be larger than the number of unknown parameters in the model (dashed line).
